# Supplementary material for: Computational investigation of the Mg-ion conductivity and phase stability of MgZr4(PO4)6
Source: Royal Society of Chemistry journal article supplement (doi:10.1039/c9ra00513g), 2019-01-01
Supplement: c9ra00513g1.pdf [file c9ra00513g1.pdf]

# Electronic Supplementary Information

## Computational investigation of the Mg-ion conductivity and phase stability of $\text{MgZr}_4(\text{PO}_4)_6$

Koki Nakano,<sup>a</sup> Yusuke Noda,<sup>b</sup> Naoto Tanibata,<sup>a,c</sup> Masanobu Nakayama,<sup>\*a,b,c,d,e</sup> Koichi Kajihara,<sup>f</sup> Kiyoshi Kanamura<sup>f</sup>

- a. Department of Advanced Ceramics, Nagoya Institute of Technology, Gokiso, Showa, Nagoya, Aichi 466-8555, Japan
- b. Center for Materials research by Information Integration (CMI2), Research and Services Division of Materials Data and Integrated System (MaDIS), National Institute for Materials Science (NIMS), 1-2-1 Sengen, Tsukuba, Ibaraki 305-0047, Japan
- c. Elements Strategy Initiative for Catalysts and Batteries (ESICB), Kyoto University, 1-30 Goryo-Ohara, Nishikyo, Kyoto 615-8245, Japan
- d. Frontier Research Institute for Materials Science (FRIMS), Nagoya Institute of Technology, Gokiso, Showa, Nagoya, Aichi 466-8555, Japan
- e. Global Research Center for Environment and Energy based on Nanomaterials Science (GREEN), National Institute for Materials Science (NIMS), 1-1 Namiki, Tsukuba, Ibaraki 305-0047, Japan
- f. Department of Applied Chemistry for Environment, Graduate School of Urban Environmental Sciences, Tokyo Metropolitan University, 1-1 Minami-Osawa, Hachioji, Tokyo 192-0397, Japan

(a)

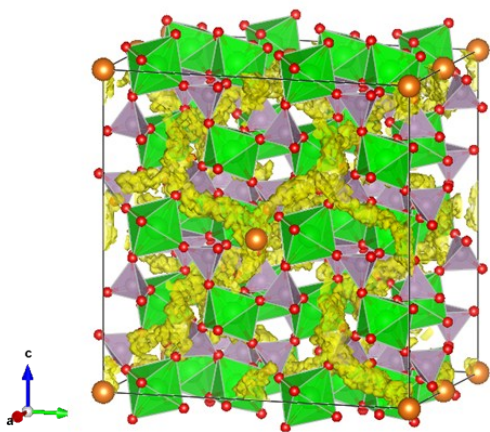

(b)

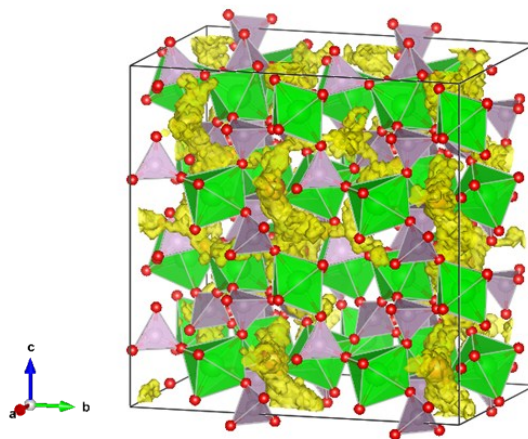

**Supporting Figure S1.** Trace of Mg atom in FPMD simulation at 1573 K. (a) and (b) show the NASICON-type and  $\beta$ -iron sulfate-type structures, respectively.

**Supporting Table S1.** Mg-Ion Conductivity ( $\sigma_{Mg}$ ) and Activation Energy ( $E_{act}$ ) of Mg-Ion Conductors

| Study                                                                                                                                                              | $\sigma_{Mg}$ [S cm <sup>-1</sup> ] | $E_{act}$ [eV] |
|--------------------------------------------------------------------------------------------------------------------------------------------------------------------|-------------------------------------|----------------|
| Theoretical ( $\beta$ -iron sulfate-type, this paper)                                                                                                              | $3.9 \times 10^{-3}$ (bulk, 873 K)  | 0.71           |
| Theoretical (NASICON-type, this paper)                                                                                                                             | $7.1 \times 10^{-3}$ (bulk, 873 K)  | 0.63           |
| Experimental <sup>21</sup> ( $\beta$ -iron sulfate-type)                                                                                                           | $1 \times 10^{-5}$ (873 K)          | 1.6            |
| Experimental <sup>21</sup> Mg <sub>0.7</sub> (Zr <sub>0.85</sub> Nb <sub>0.15</sub> ) <sub>4</sub> P <sub>6</sub> O <sub>24</sub><br>( $\beta$ -iron sulfate-type) | $1.1 \times 10^{-7}$ (573 K)        | 0.92           |
| Experimental <sup>22</sup> Mg <sub>0.7</sub> (Zr <sub>0.85</sub> Nb <sub>0.15</sub> ) <sub>4</sub> P <sub>6</sub> O <sub>24</sub><br>( $\beta$ -iron sulfate-type) | $1.1 \times 10^{-6}$ (total, 623 K) | 1.18           |
| Experimental <sup>18</sup> (Mg <sub>0.1</sub> Hf <sub>0.9</sub> ) <sub>4/3.8</sub> Nb(PO <sub>4</sub> ) <sub>3</sub><br>(NASICON-type)                             | $2.1 \times 10^{-6}$ (bulk, 573 K)  | 0.68           |
